# Supplementary material
Source: PubMed Central journal article supplement (PMC4249547)
Supplement: AAC.02900-14_zac011143449so1.pdf [file AAC.02900-14_zac011143449so1.pdf]

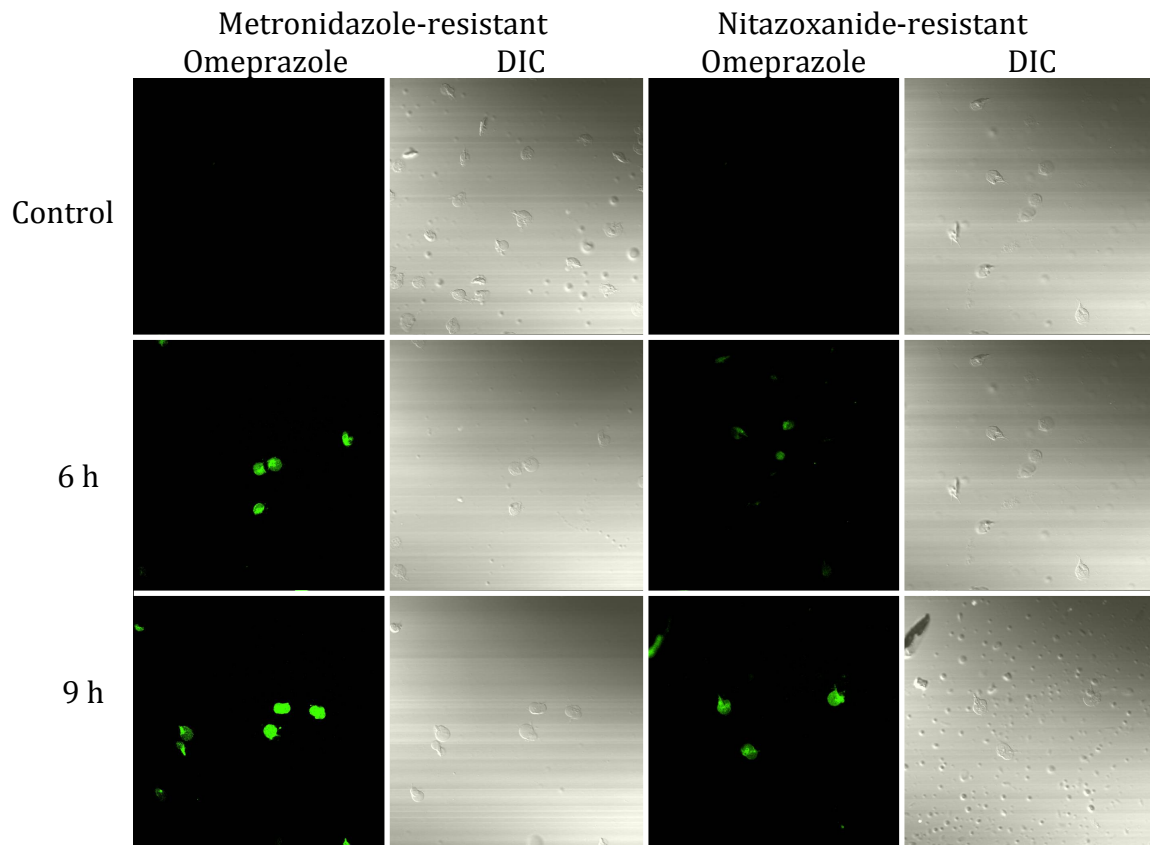

**Figure S1. Confocal Microscopy of drug-resistant *Giardia* trophozoites incubated without and with omeprazole 1 mM. Magnification 60 x**

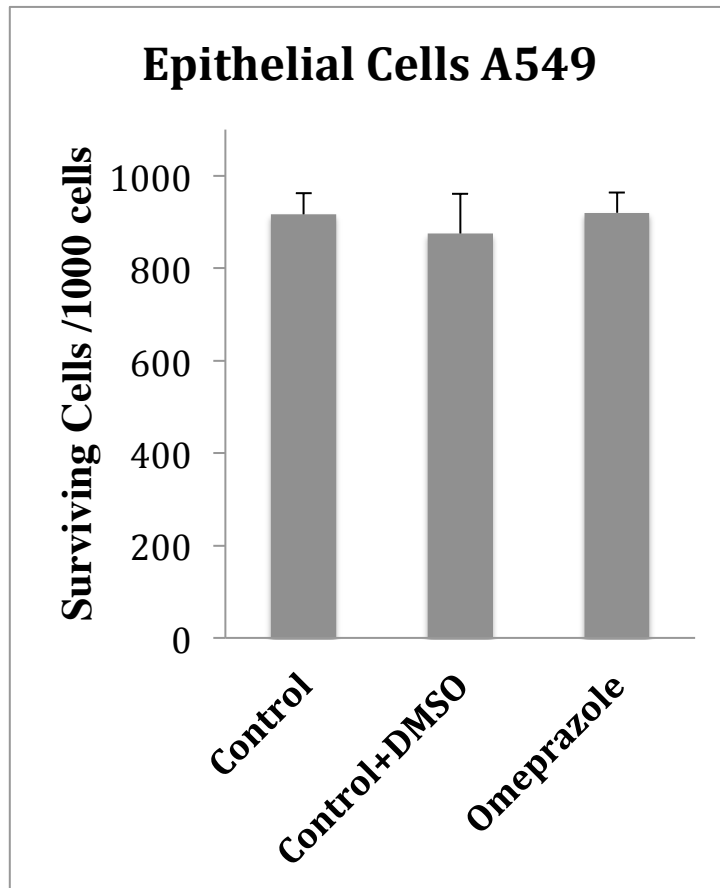

**Figure S2.** Incubation of human epithelial cells with 300  $\mu$ M omeprazole ( $\approx$  LD<sub>50</sub> of *Giardia* strains at 24 h) in the same conditions as *Giardia* trophozoite cultures.

**Figure S3. Markers related to drug resistance.**

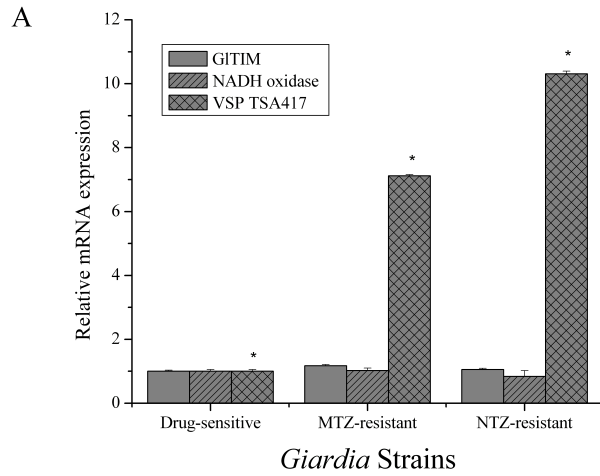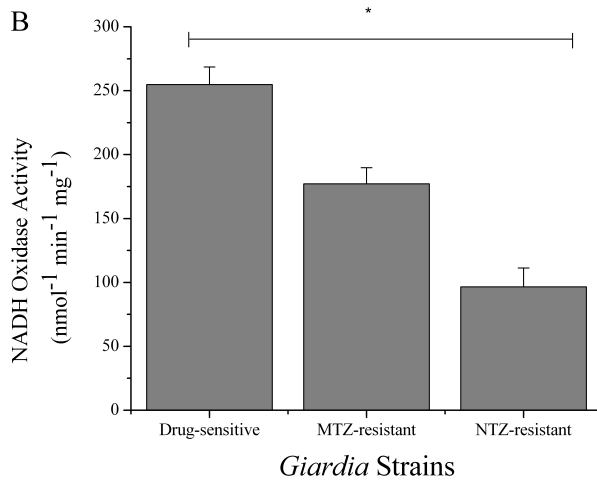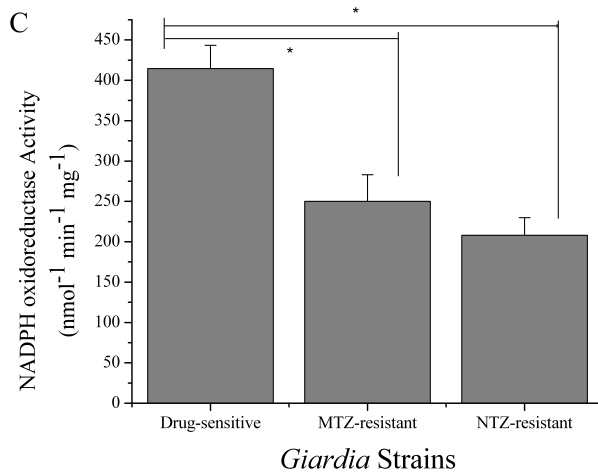

A) Gen expression of GITIM, NADH oxidase and VSP TSA417, B) enzyme activity of NADH oxidase, and C) enzyme activity of NADPH oxidoreductase. (\*) Statistical difference  $p < 0.5$  among strains.
